# Supplementary material
Source: ML conference proceedings conference paper supplement (https://proceedings.mlr.press/v37/shahb15.html)
Supplement: Supplementary file 1 [file shahb15-supp.pdf]

---

# An Empirical Study of Stochastic Variational Algorithms for the Beta Bernoulli Process Supplementary Material

---

Amar Shah \*

AS793@CAM.AC.UK

David A. Knowles †

DAVIDKNOWLES@CS.STANFORD.EDU

Zoubin Ghahramani \*

ZOUBIN@ENG.CAM.AC.UK

\* University of Cambridge, Department of Engineering, Cambridge, UK

† Stanford University, Department of Computer Science, Stanford, CA, USA

In this document, we provide details about the local variable approximations introduced in the main text of the paper.

## Variational Inference Schemes

### Mimno-SVI

The form of the local approximation in the Mimno-SVI method is

$$\begin{aligned}
\log q_{\text{Mimno}}(\boldsymbol{\psi}_i) &= \mathbb{E}_{q(\boldsymbol{\beta})}[\log p(\boldsymbol{\psi}_i | \mathbf{y}_{1:N}, \boldsymbol{\beta})] \\
&= \mathbb{E}_{q(\boldsymbol{\beta})} \left[ -\frac{\gamma_{\text{obs}}}{2} \|\mathbf{y}_i - (\mathbf{z}_i \circ \mathbf{w}_i) \boldsymbol{\Phi}\|^2 + \sum_k z_{ik} \log \left( \frac{\pi_k}{1 - \pi_k} \right) - \frac{\gamma_w}{2} \mathbf{w}_i \mathbf{w}_i^\top \right] + \text{const} \\
&= -\frac{c}{2d} \sum_k z_{ik} w_{ik} \left[ w_{ik} \left( \frac{\boldsymbol{\mu}_k \boldsymbol{\mu}_k^\top}{\tau_k^2} + \frac{1}{\tau_k} \right) + \left( \sum_{j \neq k} z_{ij} w_{ij} \frac{\boldsymbol{\mu}_k \boldsymbol{\mu}_j^\top}{\tau_k \tau_j} \right) - 2 \frac{\boldsymbol{\mu}_k \mathbf{y}_i^\top}{\tau_k} \right] \\
&\quad + \sum_k z_{ik} (\psi(a_k) - \psi(b_k)) - \frac{e}{2f} \mathbf{w}_i \mathbf{w}_i^\top + \text{const}
\end{aligned}$$

It is clear that  $\log q_{\text{Mimno}}$  is quadratic in each  $w_{ik}$  and linear in each  $z_{ik}$ , therefore a Gibbs based sampler can easily be constructed to sample from  $q_{\text{Mimno}}$ , where  $w_{ik}$  is Gaussian given all other local variables, and  $z_{ik}$  is Bernoulli given all other local variables.

### MF-SSVI

The local ELBO in the MF-SSVI framework is very similar to that of the MF-SVI, the difference being that samples of the global variables are used in MF-SSVI. The local ELBO has the following form

$$\begin{aligned}
\mathcal{L}_{\text{local}}^{\text{MF-SSVI}} &= \frac{\gamma_{\text{obs}}}{2} \sum_{i,k} \theta_{ik} \phi_k \left[ 2 \frac{\nu_{ik}}{\kappa_{ik}} \mathbf{y}_i^\top - \left( \frac{\nu_{ik}^2}{\kappa_{ik}^2} + \frac{1}{\kappa_{ik}} \right) \phi_k^\top - \sum_{j \neq k} \theta_{ij} \frac{\nu_{ij}}{\kappa_{ij}} \frac{\nu_{ik}}{\kappa_{ik}} \phi_j^\top \right] \\
&\quad - \frac{\gamma_w}{2} \sum_{i,k} \left( \frac{\nu_{ik}^2}{\kappa_{ik}^2} + \frac{1}{\kappa_{ik}} \right) + \sum_{i,k} \theta_{ik} \left( \frac{\pi_k}{1 - \pi_k} \right) \\
&\quad - \frac{1}{2} \sum_{i,k} \log(\kappa_{ik}) - \sum_{i,k} [\theta_{ik} \log \theta_{ik} + (1 - \theta_{ik}) \log(1 - \theta_{ik})].
\end{aligned}$$

This is optimized as a function of  $\{\theta_{ik}, \nu_{ik}, \kappa_{ik}\}$  using gradient descent. Once a local optimum is found,  $\mathbb{E}_{q_{\text{MF}}(\psi_{1:N}|\beta^{(t)})}[\boldsymbol{\eta}_i]$  can be computed analytically as a function of the optimized parameters and global variable samples.

### Titsias-SSVI

Recall that the Titsias-SSVI method maintains dependence between  $z_{ik}$  and  $w_{ik}$  for each  $k$ . The local ELBO for Titsias-SSVI is

$$\begin{aligned} \mathcal{L}_{\text{local}}^{\text{Titsias-SSVI}} &= \frac{\gamma_{\text{obs}}}{2} \sum_{i,k} \theta_{ik} \phi_k \left[ 2 \frac{\nu_{ik}}{\kappa_{ik}} \mathbf{y}_i^\top - \left( \frac{\nu_{ik}^2}{\kappa_{ik}^2} + \frac{1}{\kappa_{ik}} \right) \phi_k^\top - \sum_{j \neq k} \theta_{ij} \frac{\nu_{ij}}{\kappa_{ij}} \frac{\nu_{ik}}{\kappa_{ik}} \phi_j^\top \right] \\ &\quad - \frac{\gamma_w}{2} \sum_{i,k} \left( \frac{\nu_{ik}^2}{\kappa_{ik}^2} + \frac{1}{\kappa_{ik}} \right) + \sum_{i,k} \theta_{ik} \left( \frac{\pi_k}{1 - \pi_k} \right) \\ &\quad - \frac{1}{2} \sum_{i,k} \left[ \theta_{ik} (\log(\kappa_{ik}) - 1) + (1 - \theta_{ik}) (\log(\gamma_w) - 1) \right] \\ &\quad - \sum_{i,k} [\theta_{ik} \log \theta_{ik} + (1 - \theta_{ik}) \log(1 - \theta_{ik})]. \end{aligned}$$

Again, this function is maxized as a function of  $\{\theta_{ik}, \nu_{ik}, \kappa_{ik}\}$  using gradient descent, and the optimized parameters along with the global variable samples are used to compute  $\mathbb{E}_{q_{\text{Titsias}}(\psi_{1:N}|\beta^{(t)})}[\boldsymbol{\eta}_i]$  analytically.

### Gibbs-SSVI

The Gibbs-SVI method uses the true posterior conditional distribution for local variables

$$\begin{aligned} \log q_{\text{Gibbs}}(\boldsymbol{\psi}_i) &= \log p(\boldsymbol{\psi}_i | \mathbf{y}_{1:N}, \boldsymbol{\beta}) \\ &= -\frac{\gamma_{\text{obs}}}{2} \|\mathbf{y}_i - (z_i \circ \mathbf{w}_i) \boldsymbol{\Phi}\|^2 + \sum_k z_{ik} \log \left( \frac{\pi_k}{1 - \pi_k} \right) - \frac{\gamma_w}{2} \mathbf{w}_i \mathbf{w}_i^\top + \text{const} \\ &= -\frac{\gamma_{\text{obs}}}{2} \sum_k z_{ik} w_{ik} \phi_k \left[ w_{ik} \phi_k^\top + \left( \sum_{j \neq k} z_{ij} w_{ij} \phi_j^\top \right) - 2\mathbf{y}_i^\top \right] \\ &\quad + \sum_k z_{ik} \log \left( \frac{\pi_k}{1 - \pi_k} \right) - \frac{\gamma_w}{2} \mathbf{w}_i \mathbf{w}_i^\top + \text{const} \end{aligned}$$

Just as was the case with Mimno-SVI, we notice that  $\log q_{\text{Gibbs}}$  is quadratic in each  $w_{ik}$  and linear in each  $z_{ik}$ , therefore a Gibbs sampler can be designed to sample from  $q_{\text{Gibbs}}$ .
